# Supplementary material for: Supramolecular confinement of polymeric electron transfer mediator on gold surface for picomolar detection of DNA
Source: Royal Society of Chemistry journal article supplement (doi:10.1039/c1sm06300f), 2011-01-01
Supplement: c1sm06300f.pdf [file c1sm06300f.pdf]

Supplementary Information

**Supramolecular confinement of polymeric electron transfer mediator  
on gold surface for picomolar detection of DNA**

Mayreli Ortiz,<sup>a</sup> Mabel Torréns,<sup>a</sup> Nuria Canela,<sup>b</sup> Alex Fragoso,<sup>\*a</sup> Ciara O'Sullivan<sup>\*a,c</sup>

<sup>a</sup> Nanobiotechnology & Bioanalysis Group, Departament d'Enginyeria Química, Universitat Rovira i Virgili, Avinguda Països Catalans 26, 43007 Tarragona, Spain E-mail: alex.fragoso@urv.cat, ciara.osullivan@urv.cat

<sup>b</sup> Unitat de Biologia Molecular, Servei de Recursos Científics i Tècnics, Universitat Rovira i Virgili. Avinguda Països Catalans 26, 43007 Tarragona, Spain.

<sup>c</sup> Institució Catalana de Recerca i Estudis Avançats, Passeig Lluís Companys, 23, 08010 Barcelona, Spain.

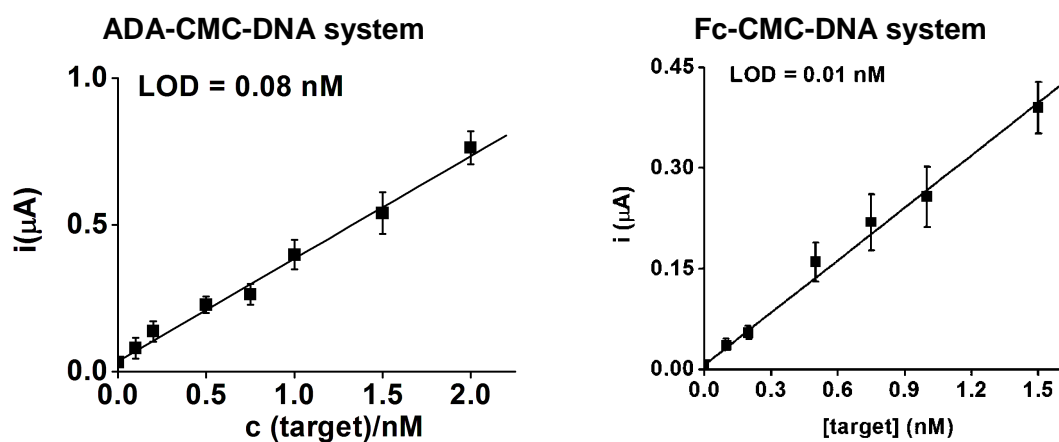

**Fig S1.** Comparison of calibration plots obtained for ADA-CMC-DNA and Fc-DNA-DNA systems.

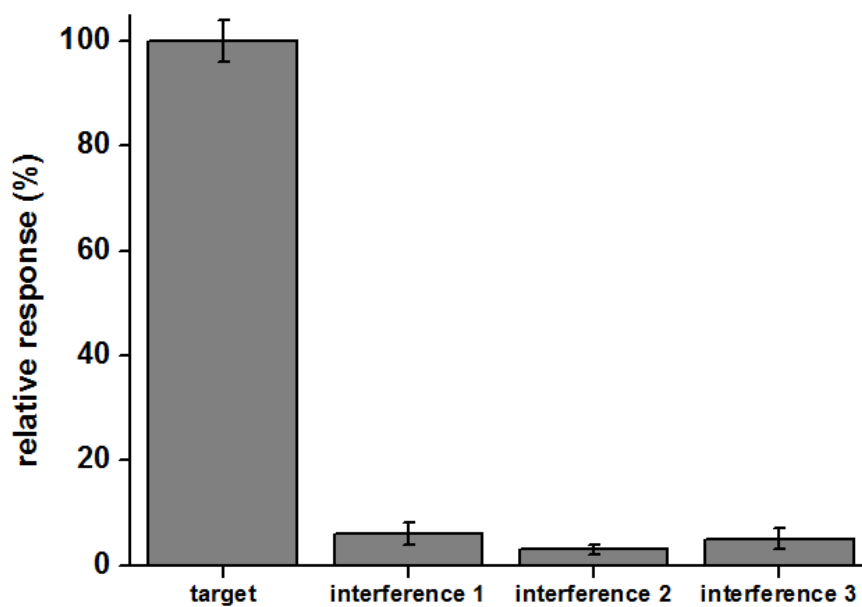

**Fig S2.** Sequence selectivity. Comparison of amperometric responses obtained with the HLA DQA102 target sequence and with interfering probes 1-3 (see Experimental section for oligonucleotide sequences)
